# Supplementary material for: DFT study of the adsorption of microsolvated glycine on a hydrophilic amorphous silica surface
Source: Royal Society of Chemistry journal article supplement (doi:10.1039/b806501b), 2008-01-01
Supplement: b806501b.pdf [file b806501b.pdf]

Supplementary material for B806501B

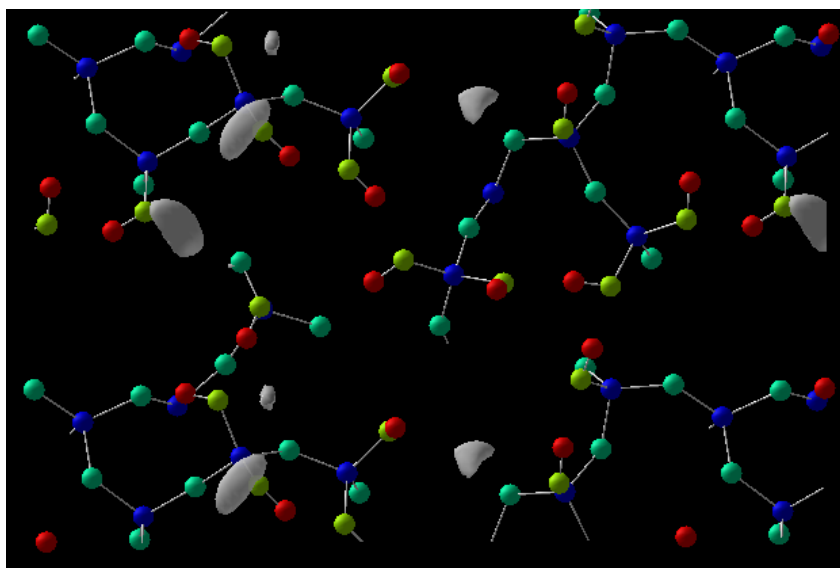

Figure 1: Electrostatic potential isosurface of  $-4\text{eV}$  of the studied amorphous silica surface. (Top view: H: red, Si: blue, O: green and yellow). One can clearly notice that the most negative zones of the electrostatic potential (nucleophile/electron donor zone) appears around the vicinal silanols of the hydroxylated silica surface.

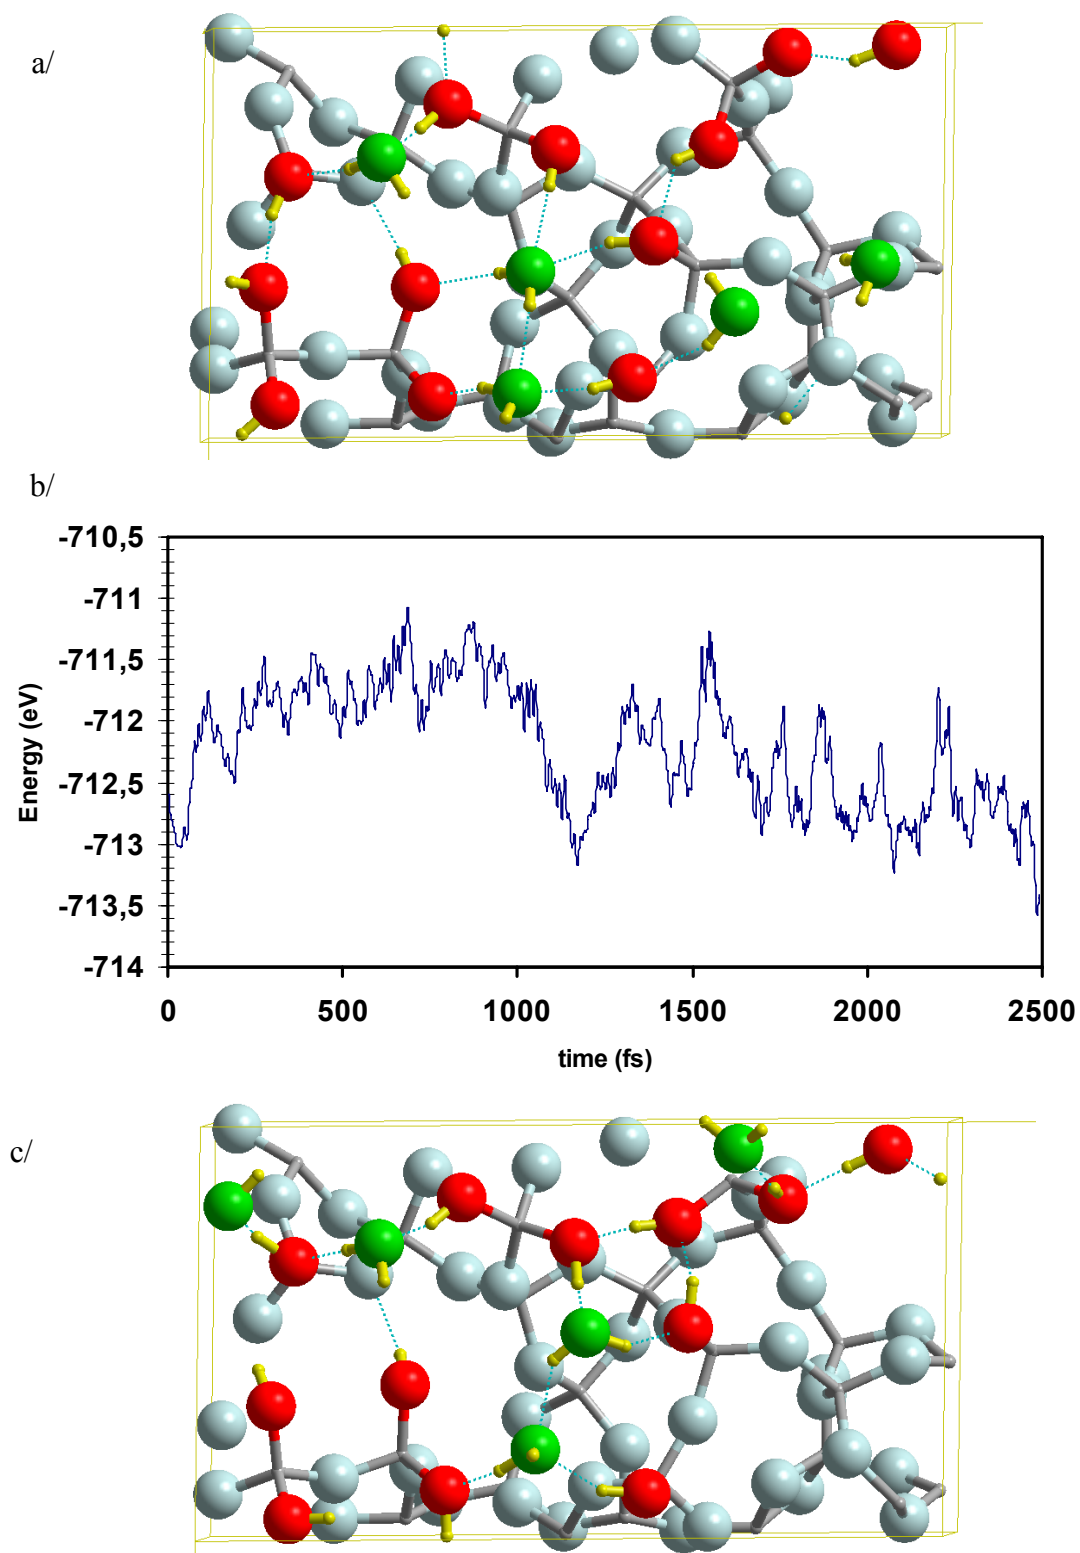

Figure 2: MD run at 300K of five water molecules in interaction with the hydroxylated silica surface. a/ starting configuration, b/ energy versus time of simulation, c/ final configuration. Green: Oxygen of water molecules; Red: Oxygen of silanol, Large light gray: Oxygen in siloxane bridge, small dark grey: Si atoms.

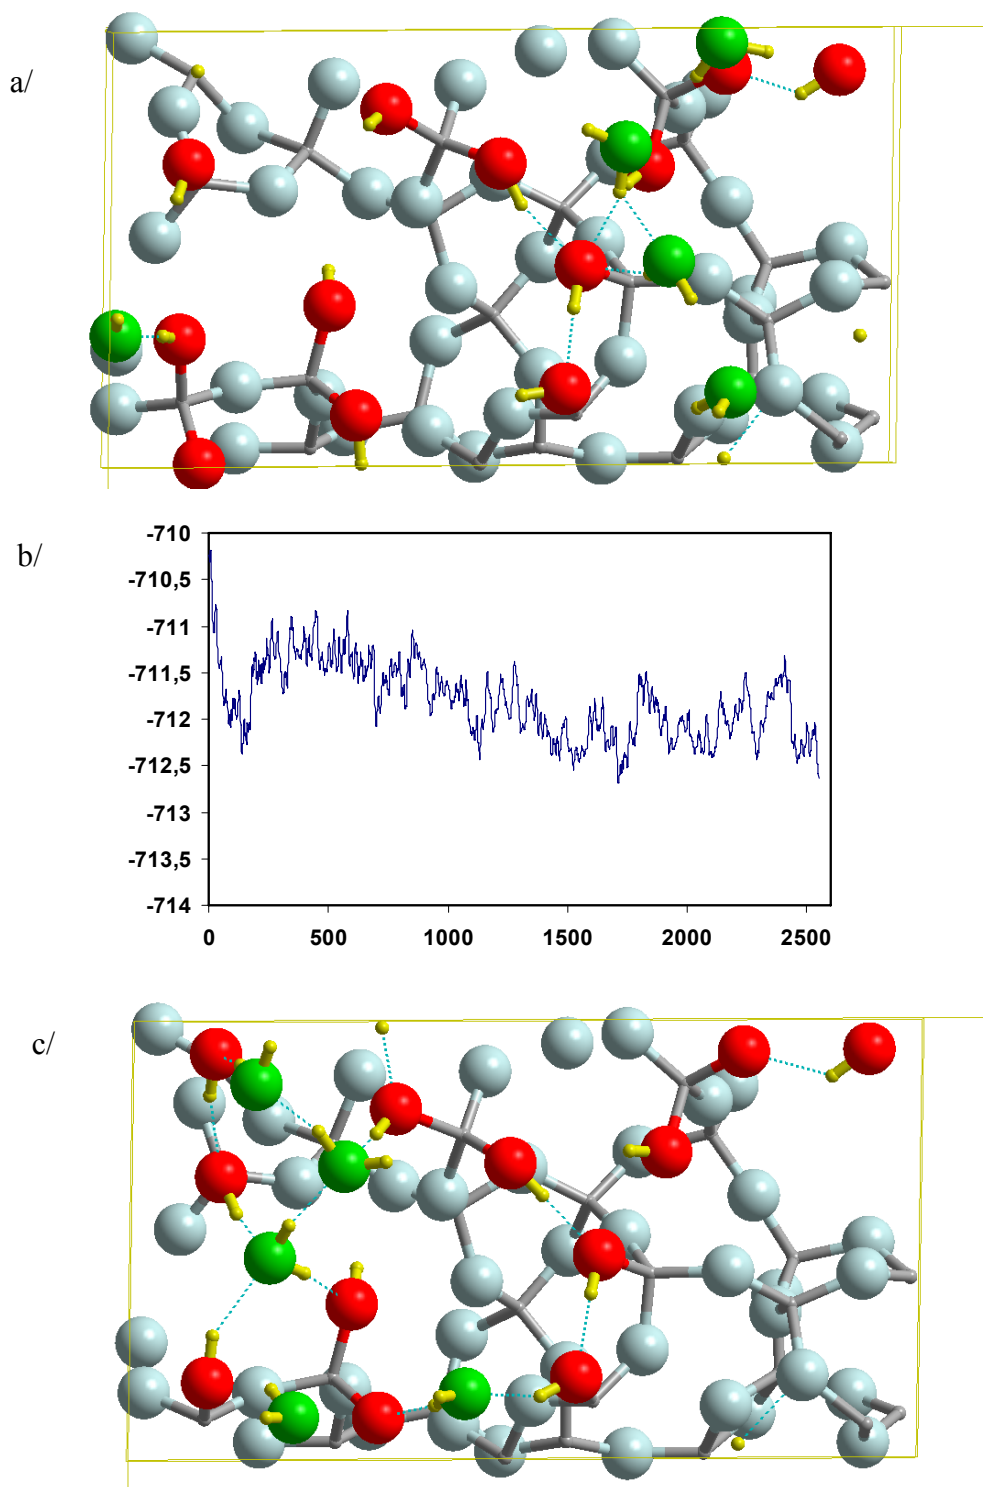

Figure 3 : MD run at 300K of five water molecules in interaction with the hydroxylated silica surface. a/ starting configuration, b/ energy versus time of simulation, c/ configuration at a local minimum at the end of the simulation. Green: Oxygen of water molecules; Red: Oxygen of silanol, Large light gray: Oxygen in siloxane bridge, small dark grey: Si atoms.

a/

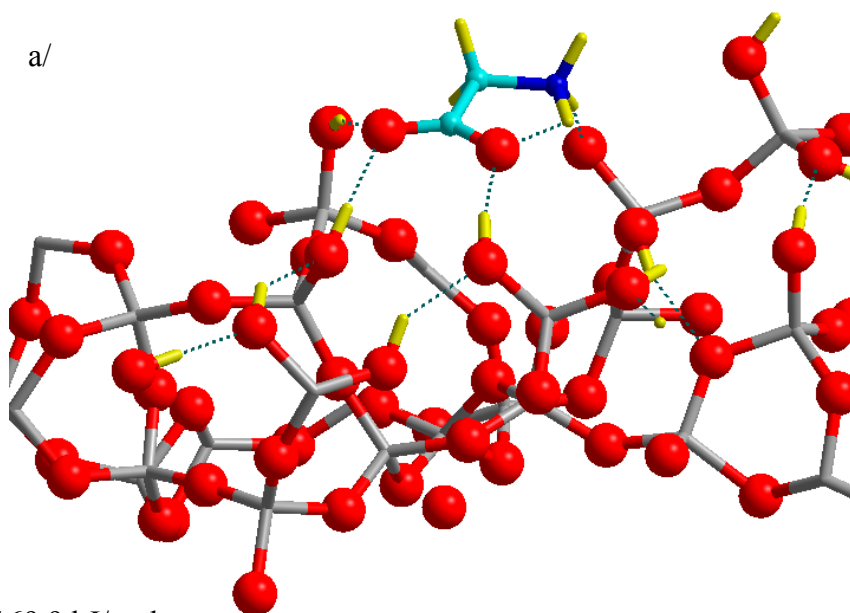

$$E_{\text{ads}} = -169.9 \text{ kJ/mol}$$

b/

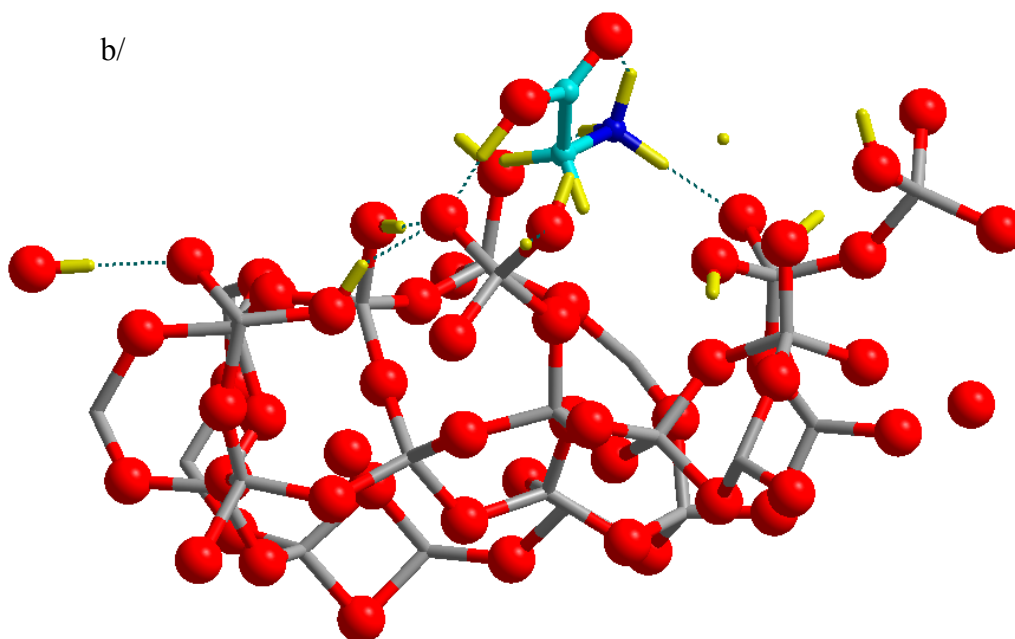

$$E_{\text{ads}} = -163.2 \text{ kJ/mol}$$

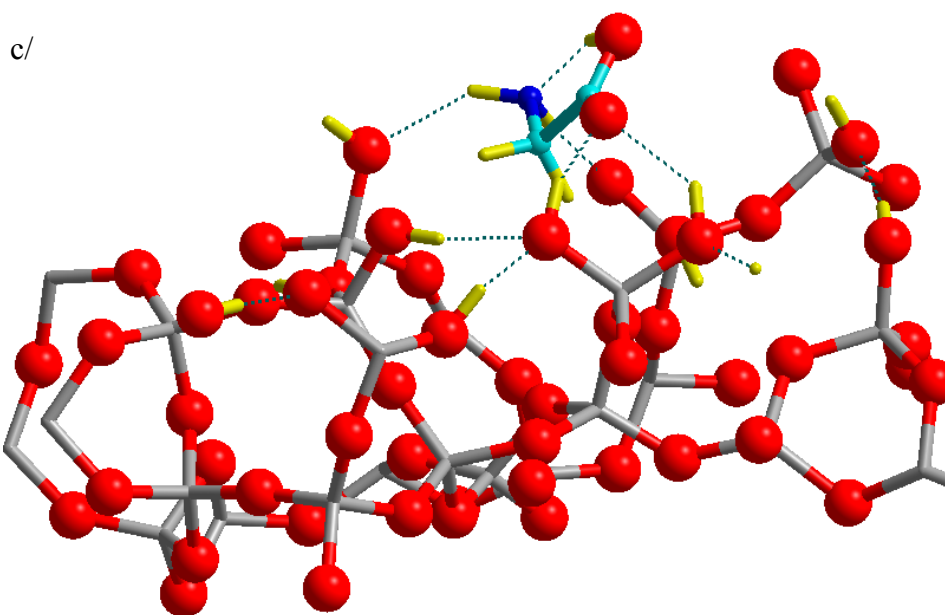

$$E_{\text{ads}} = -136.2 \text{ kJ/mol}$$

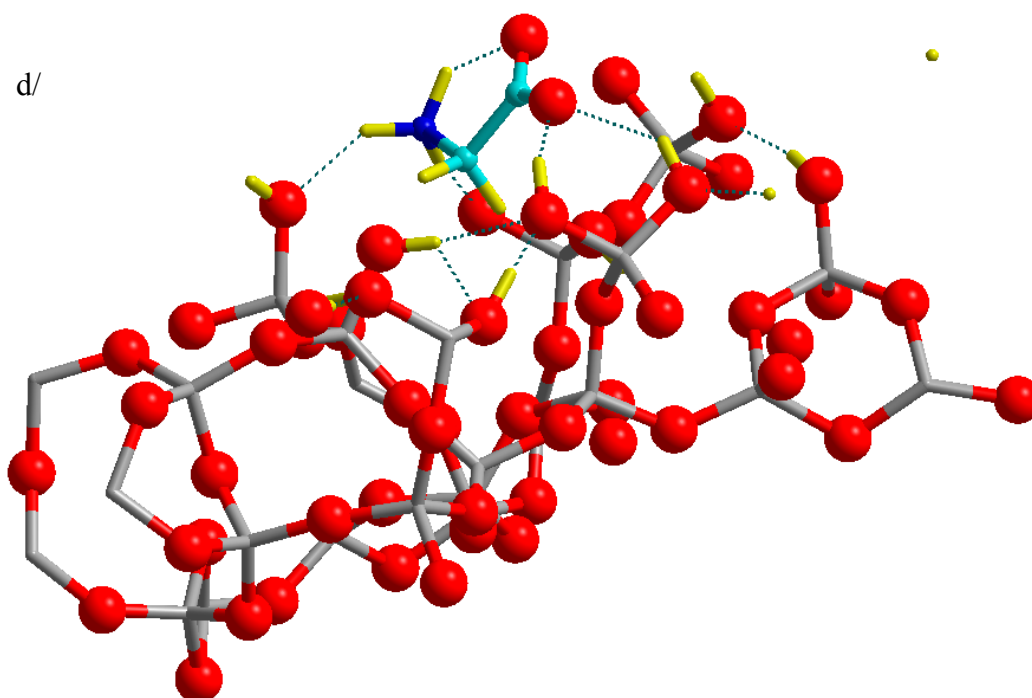

$$E_{\text{ads}} = -102.4 \text{ kJ/mol}$$

Figure 4 : Optimized geometries of glycine in several conformations on the hydroxylated silica surface.
